# Supplementary material for: Is litter biomass a driver of soil volatile organic compound fluxes in Mediterranean forest?
Source: Copernicus journal article supplement (doi:10.5194/bg-22-3661-2025), 2025-07-29
Supplement: Supplementary file 1 [file bg-22-3661-2025-supplement.zip]

1

2

Box plot showing the flux ( $F$ ) of various VOCs from litter and soil. The y-axis represents  $F$  ( $\mu\text{g m}^{-2} \text{h}^{-1}$ ) on a logarithmic scale from 0.4 to 12. The x-axis lists the VOCs. The legend indicates that red boxes represent Litter and teal boxes represent Soil. The plot shows that for most VOCs, the flux is higher from litter than from soil, with  $\text{CH}_4$  being the most abundant in both.

4

6

79

9

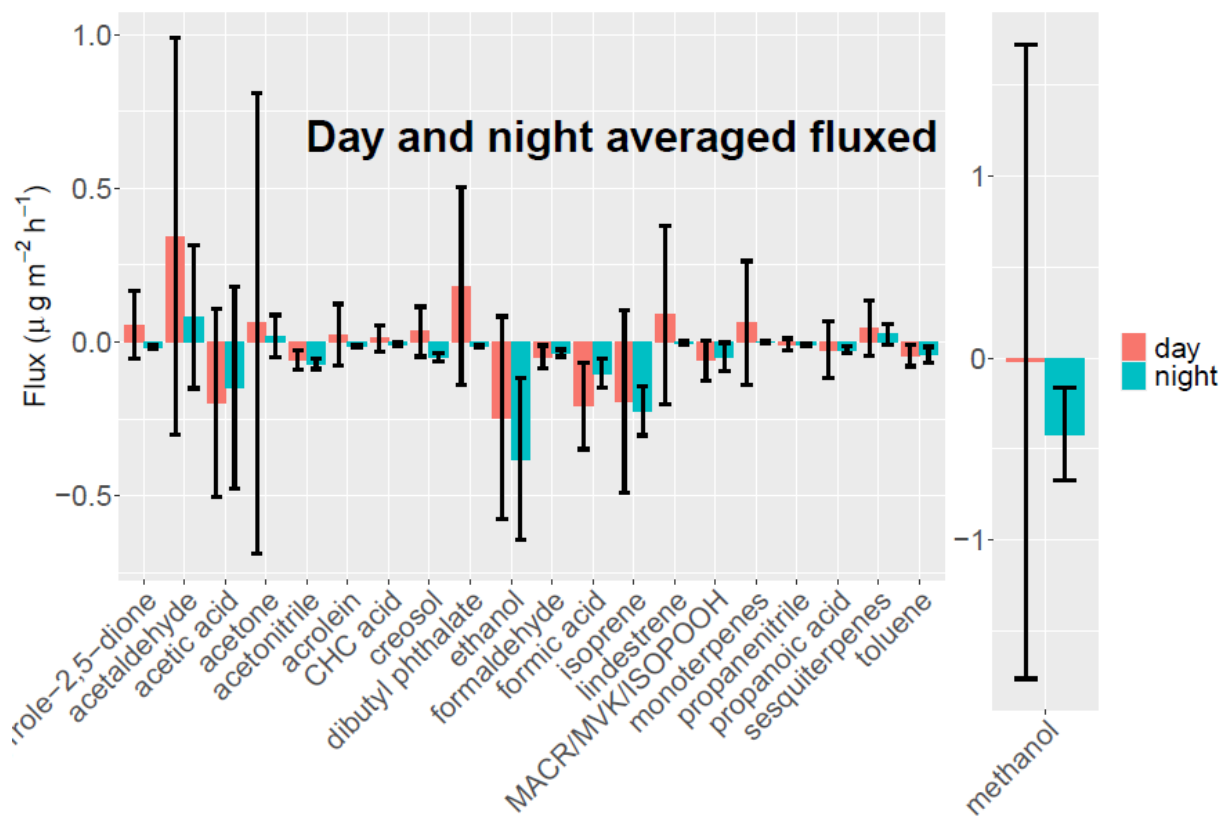

**Figure S2.** Averaged fluxes including bare soil and all litters and their standard deviation (black lines) separated by day and night data.

## 14 Supplementary tables:

| Soil and litter humidity during the field campaign |        |                          |                             |     |                                   |                                     |                   |                        |                |                                    |
|----------------------------------------------------|--------|--------------------------|-----------------------------|-----|-----------------------------------|-------------------------------------|-------------------|------------------------|----------------|------------------------------------|
| Chamber                                            | Sample | Date flux VOC<br>(dd/mm) | Date weight<br>(dd/mm/yyyy) | Day | Dry Mass<br>(DM)(g)<br>empty tube | Fresh Mass<br>(FM) (g)<br>tube+soil | FM (g)<br>soil    | DM (g)<br>tube + soil  | DM (g)<br>soil |                                    |
| Chamber 1<br>(bare soil)                           | Soil   | 23-24/05                 | 24/5/2023                   | J1  | 9.84                              | 17.15                               | 7.31              | 13.64                  | 3.52           |                                    |
| Chamber 2                                          | Soil   | 23-24/05                 | 24/5/2023                   | J1  | 9.87                              | 19.94                               | 10.06             | 16.29                  | 3.64           |                                    |
| Chamber 3                                          | Soil   | 23-24/05                 | 24/5/2023                   | J1  | 9.89                              | 22.34                               | 12.44             | 17.56                  | 4.77           |                                    |
| Chamber 4                                          | Soil   | 23-24/05                 | 24/5/2023                   | J1  | 9.89                              | 25.03                               | 15.14             | 20.21                  | 4.82           |                                    |
| Chamber 5                                          | Soil   | 23-24/05                 | 24/5/2023                   | J1  | 9.93                              | 23.54                               | 13.61             | 18.61                  | 4.94           |                                    |
| Chamber 1<br>(bare soil)                           | Soil   | 24-25/05                 | 25/5/2023                   | J2  | 9.91                              | 21.24                               | 11.34             | 14.92                  | 6.33           |                                    |
| Chamber 2                                          | Soil   | 24-25/05                 | 25/5/2023                   | J2  | 9.81                              | 27.82                               | 18.01             | 21.11                  | 6.72           |                                    |
| Chamber 3                                          | Soil   | 24-25/05                 | 25/5/2023                   | J2  | 9.89                              | 25.92                               | 16.03             | 18.98                  | 6.94           |                                    |
| Chamber 4                                          | Soil   | 24-25/05                 | 25/5/2023                   | J2  | 9.88                              | 25.43                               | 15.54             | 19.48                  | 5.95           |                                    |
| Chamber 5                                          | Soil   | 24-25/05                 | 25/5/2023                   | J2  | 9.94                              | 25.62                               | 15.67             | 19.39                  | 6.22           |                                    |
| Chamber 1<br>(bare soil)                           | Soil   | 25-26/05                 | 26/5/2023                   | J3  | 9.87                              | 22.75                               | 12.87             | 16.48                  | 6.26           |                                    |
| Chamber 2                                          | Soil   | 25-26/05                 | 26/5/2023                   | J3  | 9.82                              | 27.46                               | 17.64             | 21.98                  | 5.48           |                                    |
| Chamber 3                                          | Soil   | 25-26/05                 | 26/5/2023                   | J3  | 9.83                              | 26.12                               | 16.29             | 18.95                  | 7.17           |                                    |
| Chamber 4                                          | Soil   | 25-26/05                 | 26/5/2023                   | J3  | 9.91                              | 28.31                               | 18.41             | 21.51                  | 6.81           |                                    |
| Chamber 5                                          | Soil   | 25-26/05                 | 26/5/2023                   | J3  | 9.73                              | 24.64                               | 14.91             | 19.04                  | 5.59           |                                    |
| Chamber                                            | Sample | Date flux VOC<br>(dd/mm) | Date weight<br>(dd/mm/yyyy) | Day | FM (g)<br>litter                  | FM(g)<br>aliquot                    | DM (g)<br>aliquot | Litter humidity<br>(%) | DM (g)         | Dry masses<br>(g m <sup>-2</sup> ) |
| Chamber 2                                          | Litter | 23-24/05                 | 24/5/2023                   | J1  | 8.88                              | 7.99                                | 6.68              | 16.43                  | 7.42           | 110.7                              |
| Chamber 3                                          | Litter |                          | 24/5/2023                   | J1  | 16.69                             | 7.99                                | 6.66              | 16.79                  | 13.88          | 205.9                              |
| Chamber 4                                          | Litter |                          | 24/5/2023                   | J1  | 30.1                              | 8.01                                | 6.91              | 13.79                  | 25.95          | 387.3                              |
| Chamber 5                                          | Litter |                          | 24/5/2023                   | J1  | 43.3                              | 8.02                                | 5.57              | 30.55                  | 30.07          | 448.8                              |
| Chamber 2                                          | Litter | 24-25/05                 | 25/5/2023                   | J2  | 7.10                              | 7.09                                | 4.24              | 40.22                  | 4.25           | 63.4                               |
| Chamber 3                                          | Litter |                          | 25/5/2023                   | J2  | 14.60                             | 7.98                                | 4.68              | 41.24                  | 8.58           | 128.1                              |
| Chamber 4                                          | Litter |                          | 25/5/2023                   | J2  | 31.70                             | 8.08                                | 6.66              | 17.57                  | 26.13          | 390.0                              |
| Chamber 5                                          | Litter |                          | 25/5/2023                   | J2  | 50.60                             | 8.09                                | 5.92              | 26.94                  | 36.97          | 551.8                              |

|           |        |          |           |    |       |      |      |       |       |       |
|-----------|--------|----------|-----------|----|-------|------|------|-------|-------|-------|
| Chamber 2 | Litter | 25-26/05 | 26/5/2023 | J3 | 8.00  | 3.60 | 3.08 | 14.41 | 6.85  | 102.3 |
| Chamber 3 | Litter |          | 26/5/2023 | J3 | 16.00 | 6.90 | 5.32 | 22.86 | 12.34 | 183.5 |
| Chamber 4 | Litter |          | 26/5/2023 | J3 | 32.00 | 8.00 | 6.33 | 20.94 | 25.30 | 377.6 |
| Chamber 5 | Litter |          | 26/5/2023 | J3 | 48.00 | 8.00 | 3.88 | 51.44 | 23.31 | 347.9 |

**Table S1.** Soil and litter fresh and dry masses (in g) and dry masses per area ( $\text{g m}^{-2}$ ), humidity inside the chambers during the field campaign experiment.

| m/z          | Chemical formula (with $\text{H}^+$ ) | Name                                       | Ambient Mean concentration $\pm$ std (ppbv) DAY 1 | Ambient Mean concentration $\pm$ std (ppbv) DAY 2 | Ambient Mean concentration $\pm$ std (ppbv) DAY 3 |
|--------------|---------------------------------------|--------------------------------------------|---------------------------------------------------|---------------------------------------------------|---------------------------------------------------|
| m/z 31.01694 | $\text{C}_1\text{H}_3\text{O}_1$      | formaldehyde                               | $0.234 \pm 0.09$                                  | $0.239 \pm 0.045$                                 | $0.241 \pm 0.073$                                 |
| m/z 33.03393 | $\text{C}_1\text{H}_5\text{O}_1$      | methanol                                   | $3.668 \pm 1.714$                                 | $2.22 \pm 0.536$                                  | $2.461 \pm 1.11$                                  |
| m/z 42.03758 | $\text{C}_2\text{H}_4\text{N}$        | acetonitrile                               | $0.126 \pm 0.022$                                 | $0.198 \pm 0.019$                                 | $0.19 \pm 0.047$                                  |
| m/z 45.03087 | $\text{C}_2\text{H}_5\text{O}$        | acetaldehyde                               | $0.743 \pm 0.294$                                 | $0.728 \pm 0.124$                                 | $0.694 \pm 0.233$                                 |
| m/z 47.01352 | $\text{CH}_3\text{O}_2$               | formic acid                                | $0.507 \pm 0.208$                                 | $0.549 \pm 0.104$                                 | $0.552 \pm 0.255$                                 |
| m/z 47.04655 | $\text{C}_2\text{H}_7\text{O}$        | ethanol                                    | $1.281 \pm 0.496$                                 | $1.042 \pm 0.173$                                 | $0.073 \pm 0.089$                                 |
| m/z 53.03925 | $\text{C}_4\text{H}_5$                | cyclobutadiene or butenyne                 | $0.022 \pm 0.011$                                 | $0.026 \pm 0.009$                                 | $0.03 \pm 0.011$                                  |
| m/z 56.04845 | $\text{C}_3\text{H}_6\text{N}$        | propanenitrile                             | $0.031 \pm 0.008$                                 | $0.04 \pm 0.008$                                  | $0.032 \pm 0.014$                                 |
| m/z 57.03024 | $\text{C}_3\text{H}_5\text{O}$        | acrolein                                   | $0.076 \pm 0.16$                                  | $0.006 \pm 0.153$                                 | $-0.018 \pm 0.167$                                |
| m/z 59.0493  | $\text{C}_3\text{H}_7\text{O}$        | acetone                                    | $1.339 \pm 0.47$                                  | $1.174 \pm 0.206$                                 | $1.103 \pm 0.274$                                 |
| m/z 60.05095 | $\text{C}_3\text{H}_8\text{O}$        | <u>acetamide (Sarkar et al., 2016)</u>     | $0.057 \pm 0.019$                                 | $0.053 \pm 0.009$                                 | $0.051 \pm 0.012$                                 |
| m/z 61.02929 | $\text{C}_2\text{H}_5\text{O}_2$      | acetic acid                                | $0.683 \pm 0.242$                                 | $0.658 \pm 0.102$                                 | $0.602 \pm 0.208$                                 |
| m/z 62.02913 | $\text{CH}_4\text{NO}_2$              | <u>nitromethane (Inomata et al., 2014)</u> | $0.018 \pm 0.005$                                 | $0.015 \pm 0.003$                                 | $0.013 \pm 0.004$                                 |
| m/z 69.06937 | $\text{C}_5\text{H}_9$                | isoprene                                   | $0.515 \pm 0.413$                                 | $0.223 \pm 0.127$                                 | $0.48 \pm 0.476$                                  |
| m/z 71.04503 | $\text{C}_4\text{H}_7\text{O}$        | MACR/MVK/ISOPOOH                           | $0.133 \pm 0.103$                                 | $0.073 \pm 0.027$                                 | $0.095 \pm 0.071$                                 |
| m/z 75.04034 | $\text{C}_3\text{H}_7\text{O}_2$      | propanoic acid                             | $0.142 \pm 0.05$                                  | $0.135 \pm 0.021$                                 | $0.128 \pm 0.028$                                 |
| m/z 79.06013 | $\text{C}_6\text{H}_7$                | benzene                                    | $0.04 \pm 0.009$                                  | $0.032 \pm 0.009$                                 | $0.026 \pm 0.008$                                 |

|                 |                                                |                                                                              |               |               |               |
|-----------------|------------------------------------------------|------------------------------------------------------------------------------|---------------|---------------|---------------|
| m/z<br>85.01845 | C <sub>4</sub> H <sub>5</sub> S                | thiophene                                                                    | 0.023 ± 0.019 | 0.026 ± 0.018 | 0.021 ± 0.015 |
| m/z<br>85.06795 | C <sub>5</sub> H <sub>9</sub> O                | <u>cyclopentanone</u><br>(Mancuso et al., 2015)                              | 0.032 ± 0.016 | 0.02 ± 0.007  | 0.016 ± 0.007 |
| m/z<br>87.04397 | C <sub>4</sub> H <sub>7</sub> O <sub>2</sub>   | <u>2,3-butadione</u> (Sarkar et al., 2016)                                   | 0.096 ± 0.041 | 0.099 ± 0.018 | 0.083 ± 0.034 |
| m/z<br>87.08134 | C <sub>5</sub> H <sub>11</sub> O               | MBO                                                                          | 0.017 ± 0.007 | 0.01 ± 0.004  | 0.008 ± 0.004 |
| m/z<br>93.07393 | C <sub>7</sub> H <sub>9</sub>                  | toluene                                                                      | 0.094 ± 0.031 | 0.063 ± 0.019 | 0.052 ± 0.014 |
| m/z<br>95.02947 | C <sub>2</sub> H <sub>7</sub> O <sub>4</sub>   | <u>dioxybismethanol</u><br>(Meischner et al., 2022)                          | 0.013 ± 0.01  | 0.021 ± 0.009 | 0.019 ± 0.011 |
| m/z<br>97.03481 | C <sub>4</sub> H <sub>5</sub> N <sub>2</sub> O | -                                                                            | 0.022 ± 0.009 | 0.026 ± 0.005 | 0.024 ± 0.006 |
| m/z<br>98.02441 | C <sub>4</sub> H <sub>4</sub> NO <sub>2</sub>  | 1H-pyrrole-2,5-dione                                                         | 0.004 ± 0.001 | 0.004 ± 0.001 | 0.005 ± 0.002 |
| m/z<br>99.05189 | C <sub>5</sub> H <sub>7</sub> O <sub>2</sub>   | -                                                                            | 0.068 ± 0.036 | 0.042 ± 0.012 | 0.031 ± 0.012 |
| m/z<br>101.0686 | C <sub>5</sub> H <sub>9</sub> O <sub>2</sub>   | 2,3-Pentanedione or<br>acetyl acetone or 2-<br>butenoic acid methyl<br>ester | 0.081 ± 0.041 | 0.022 ± 0.017 | 0.013 ± 0.01  |
| m/z<br>107.0938 | C <sub>8</sub> H <sub>11</sub>                 | xylenes                                                                      | 0.034 ± 0.014 | 0.022 ± 0.007 | 0.016 ± 0.005 |
| m/z<br>111.0457 | C <sub>6</sub> H <sub>7</sub> O <sub>2</sub>   | -                                                                            | 0.029 ± 0.008 | 0.033 ± 0.005 | 0.029 ± 0.005 |
| m/z<br>113.0216 | C <sub>5</sub> H <sub>5</sub> O <sub>3</sub>   | -                                                                            | 0.028 ± 0.012 | 0.029 ± 0.006 | 0.028 ± 0.01  |
| m/z<br>115.0781 | C <sub>6</sub> H <sub>11</sub> O <sub>2</sub>  | -                                                                            | 0.023 ± 0.011 | 0.014 ± 0.007 | 0.012 ± 0.006 |
| m/z<br>116.0409 | C <sub>4</sub> H <sub>6</sub> NO <sub>3</sub>  | 3-Methyl-2,5-<br>oxazolidine-dione                                           | 0.001 ± 0.002 | 0.002 ± 0.002 | 0.001 ± 0.002 |
| m/z<br>129.098  | C <sub>7</sub> H <sub>13</sub> O <sub>2</sub>  | cyclohexanecarboxylic<br>acid - CHC acid                                     | 0.025 ± 0.008 | 0.012 ± 0.004 | 0.009 ± 0.005 |

|                 |                                                |                                          |               |               |               |
|-----------------|------------------------------------------------|------------------------------------------|---------------|---------------|---------------|
| m/z<br>129.1315 | C <sub>8</sub> H <sub>16</sub> O               | octanal or octanone or 1-octen-3-ol, ... | 0.007 ± 0.005 | 0.004 ± 0.003 | 0.003 ± 0.002 |
| m/z<br>137.1397 | C <sub>10</sub> H <sub>17</sub>                | monoterpenes                             | 0.065 ± 0.019 | 0.046 ± 0.029 | 0.058 ± 0.091 |
| m/z<br>139.0844 | C <sub>8</sub> H <sub>11</sub> O <sub>2</sub>  | p-cresol                                 | 0.011 ± 0.011 | 0.008 ± 0.008 | 0.005 ± 0.006 |
| m/z<br>139.129  | C <sub>10</sub> H <sub>19</sub>                | -                                        | 0.025 ± 0.009 | 0.013 ± 0.004 | 0.009 ± 0.004 |
| m/z<br>153.1204 | C <sub>10</sub> H <sub>17</sub> O              | oxygenated monoterpenes                  | 0.02 ± 0.005  | 0.014 ± 0.004 | 0.01 ± 0.002  |
| m/z<br>157.1471 | C <sub>10</sub> H <sub>20</sub> O              | -                                        | 0.029 ± 0.018 | 0.012 ± 0.003 | 0.007 ± 0.002 |
| m/z<br>205.1848 | C <sub>15</sub> H <sub>25</sub>                | sesquiterpenes                           | 0.012 ± 0.004 | 0.007 ± 0.003 | 0.008 ± 0.004 |
| m/z<br>215.1319 | C <sub>15</sub> H <sub>19</sub> O              | lindestrene                              | 0.007 ± 0.003 | 0.003 ± 0.001 | 0.003 ± 0.004 |
| m/z<br>279.1614 | C <sub>16</sub> H <sub>23</sub> O <sub>4</sub> | dibutyl phthalate                        | 0.013 ± 0.033 | 0.016 ± 0.01  | 0.025 ± 0.017 |

Table S2. Ambient mean concentrations ± std for most abundant VOC for each day of experiment.

| Component              | full<br>concentration<br>(ppb) | mass | k-rate<br>(cm <sup>3</sup> /s) | Sensitivity<br>(cps/ppb) -<br>frequency<br>25 kHz | mass<br>concentration<br>(ppb) | Transmission |
|------------------------|--------------------------------|------|--------------------------------|---------------------------------------------------|--------------------------------|--------------|
| Benzene                | 110                            | 79   | 1.93                           | 316                                               | 103.03                         | 0.672        |
| Toluene                | 110                            | 93   | 2.06                           | 335                                               | 101.93                         | 0.742        |
| Chlorobenzene          | 110                            | 113  | 2.48                           | 420                                               | 78.13                          | 0.826        |
| Ethylbenzene           | 110                            | 107  | 2.18                           | 393                                               | 100.81                         | 0.803        |
| O-xylene               | 110                            | 107  |                                |                                                   | 100.81                         |              |
| M-xylene               | 110                            | 107  |                                |                                                   | 100.81                         |              |
| P-xylene               | 110                            | 107  |                                |                                                   | 100.81                         |              |
| Styrene                | 98                             | 105  | 2.16                           | 384                                               | 89.83                          | 0.794        |
| 1,2,4-Trimethylbenzene | 110                            | 121  | 2.29                           | 453                                               | 99.71                          | 0.855        |
| 1,3,5-Trimethylbenzene | 110                            | 121  |                                |                                                   | 99.71                          |              |
| 1,2-Dichlorobenzene    | 110                            | 147  | 2.21                           | 485                                               | 59.40                          | 0.938        |
| 1,3-Dichlorobenzene    | 100                            | 147  |                                |                                                   | 54.00                          |              |
| 1,4-Dichlorobenzene    | 110                            | 147  |                                |                                                   | 59.40                          |              |
| 1,2,4-Trichlorobenzene | 100                            | 181  | 2.18                           | 381                                               | 40.81                          | 1            |

Table S3. Composition of calibration bottle with the respective concentration (ppb), mass (m/z), k-rate, sensitivity and transmission.

|              |                                              |                                     |                                           | Mean $\pm$ std ( $\mu\text{g m}^{-2} \text{h}^{-1}$ ) for different litter mass scenari |                                |                                                                  |                                                                       |                                 |
|--------------|----------------------------------------------|-------------------------------------|-------------------------------------------|-----------------------------------------------------------------------------------------|--------------------------------|------------------------------------------------------------------|-----------------------------------------------------------------------|---------------------------------|
| m/z          | Chemical formula (with H <sup>+</sup> )      | Name                                | k ( $10^{-9} \text{cm}^3 \text{s}^{-1}$ ) | Bare Soil                                                                               | Low (< 120 g m <sup>-2</sup> ) | Medium (120 g m <sup>-2</sup> $\leq$ M < 300 g m <sup>-2</sup> ) | Medium-High (300 g m <sup>-2</sup> $\leq$ M < 400 g m <sup>-2</sup> ) | High (> 400 g m <sup>-2</sup> ) |
| m/z 31.01694 | C <sub>1</sub> H <sub>3</sub> O <sub>1</sub> | formaldehyde                        | 3.169                                     | -0.043 $\pm$ 0.046                                                                      | -0.030 $\pm$ 0.035             | -0.036 $\pm$ 0.039                                               | -0.031 $\pm$ 0.038                                                    | -0.032 $\pm$ 0.035              |
| m/z 33.03393 | C <sub>1</sub> H <sub>5</sub> O <sub>1</sub> | methanol                            | 3.165                                     | -0.566 $\pm$ 0.490                                                                      | -0.292 $\pm$ 0.412             | -0.220 $\pm$ 0.360                                               | 0.105 $\pm$ 1.790                                                     | -0.162 $\pm$ 0.379              |
| m/z 42.03758 | C <sub>2</sub> H <sub>4</sub> N              | acetonitrile                        | 3.789                                     | -0.038 $\pm$ 0.040                                                                      | -0.038 $\pm$ 0.040             | -0.038 $\pm$ 0.039                                               | -0.038 $\pm$ 0.040                                                    | -0.040 $\pm$ 0.042              |
| m/z 45.03087 | C <sub>2</sub> H <sub>3</sub> O              | acetaldehyde                        | 3.125                                     | 0.173 $\pm$ 0.206                                                                       | 0.002 $\pm$ 0.124              | 0.336 $\pm$ 0.181                                                | -0.059 $\pm$ 0.181                                                    | -0.066 $\pm$ 0.084              |
| m/z 47.01352 | CH <sub>3</sub> O <sub>2</sub>               | formic acid                         | 2.353                                     | -0.090 $\pm$ 0.104                                                                      | -0.072 $\pm$ 0.091             | -0.088 $\pm$ 0.101                                               | -0.074 $\pm$ 0.094                                                    | -0.088 $\pm$ 0.103              |
| m/z 47.04655 | C <sub>2</sub> H <sub>7</sub> O              | ethanol                             | 3.131                                     | -0.383 $\pm$ 0.468                                                                      | -0.334 $\pm$ 0.402             | -0.364 $\pm$ 0.465                                               | -0.314 $\pm$ 0.452                                                    | -0.371 $\pm$ 0.469              |
| m/z 53.03925 | C <sub>4</sub> H <sub>5</sub>                | cyclobutadiene or butenyne          | 1.658                                     | -0.005 $\pm$ 0.005                                                                      | -0.004 $\pm$ 0.005             | -0.005 $\pm$ 0.005                                               | -0.004 $\pm$ 0.005                                                    | -0.004 $\pm$ 0.004              |
| m/z 56.04845 | C <sub>3</sub> H <sub>6</sub> N              | propanenitrile                      | 3.791                                     | -0.006 $\pm$ 0.006                                                                      | -0.005 $\pm$ 0.006             | -0.005 $\pm$ 0.006                                               | -0.005 $\pm$ 0.006                                                    | -0.005 $\pm$ 0.006              |
| m/z 57.03024 | C <sub>3</sub> H <sub>5</sub> O              | acrolein                            | 3.117                                     | 0.005 $\pm$ 0.029                                                                       | 0.014 $\pm$ 0.037              | 0.006 $\pm$ 0.031                                                | 0.009 $\pm$ 0.038                                                     | 0.012 $\pm$ 0.030               |
| m/z 59.0493  | C <sub>3</sub> H <sub>7</sub> O              | acetone                             | 3.122                                     | -0.213 $\pm$ 0.215                                                                      | -0.156 $\pm$ 0.73              | -0.048 $\pm$ 0.084                                               | 0.082 $\pm$ 0.271                                                     | 0.194 $\pm$ 0.251               |
| m/z 60.05095 | C <sub>3</sub> H <sub>8</sub> O              | acetamide (Sarkar et al., 2016)     | 3.124                                     | -0.008 $\pm$ 0.008                                                                      | -0.006 $\pm$ 0.007             | -0.003 $\pm$ 0.004                                               | 0.001 $\pm$ 0.010                                                     | 0.006 $\pm$ 0.008               |
| m/z 61.02929 | C <sub>2</sub> H <sub>5</sub> O <sub>2</sub> | acetic acid                         | 2.349                                     | -0.098 $\pm$ 0.118                                                                      | -0.066 $\pm$ 0.126             | -0.112 $\pm$ 0.120                                               | -0.111 $\pm$ 0.121                                                    | -0.061 $\pm$ 0.091              |
| m/z 62.02913 | CH <sub>4</sub> NO <sub>2</sub>              | nitromethane (Inomata et al., 2014) | 3.755                                     | -0.002 $\pm$ 0.002                                                                      | -0.001 $\pm$ 0.002             | -0.002 $\pm$ 0.002                                               | -0.002 $\pm$ 0.002                                                    | -0.001 $\pm$ 0.001              |
| m/z 69.06937 | C <sub>5</sub> H <sub>9</sub>                | isoprene                            | 1.838                                     | -0.075 $\pm$ 0.116                                                                      | -0.034 $\pm$ 0.096             | -0.056 $\pm$ 0.094                                               | -0.054 $\pm$ 0.118                                                    | -0.025 $\pm$ 0.086              |

|                 |                                                |                                                         |       |                                                     |                                                     |                     |                                                    |                                                     |
|-----------------|------------------------------------------------|---------------------------------------------------------|-------|-----------------------------------------------------|-----------------------------------------------------|---------------------|----------------------------------------------------|-----------------------------------------------------|
| m/z<br>70.07176 | C <sub>4</sub> H <sub>8</sub> N                | -                                                       | 3.834 | -0.002 ±<br>0.003                                   | -0.001 ±<br>0.003                                   | -0.002 ±<br>0.003   | -0.002 ±<br>0.003                                  | -0.001 ±<br>0.002                                   |
| m/z<br>71.04503 | C <sub>4</sub> H <sub>7</sub> O                | MACR/M<br>VK/ISOP<br>OOH                                | 3.119 | -0.019 ±<br>0.025                                   | -0.012 ±<br>0.019                                   | -0.016 ±<br>0.026   | -0.015 ±<br>0.026                                  | -0.015 ±<br>0.022                                   |
| m/z<br>75.04034 | C <sub>3</sub> H <sub>7</sub> O <sub>2</sub>   | propanoic<br>acid                                       | 2.395 | -0.002 ±<br>0.027                                   | -0.014 ±<br>0.015                                   | -0.020 ±<br>0.022   | -0.006 ±<br>0.022                                  | -0.017 ±<br>0.018                                   |
| m/z<br>79.06013 | C <sub>6</sub> H <sub>7</sub>                  | benzene                                                 | 1.924 | -0.004 ±<br>0.004                                   | -0.004 ±<br>0.004                                   | -0.004 ±<br>0.004   | -0.004 ±<br>0.004                                  | -0.005 ±<br>0.005                                   |
| m/z<br>85.01845 | C <sub>4</sub> H <sub>5</sub> S                | thiophene                                               | 2.016 | -0.003 ±<br>0.004                                   | -0.003 ±<br>0.004                                   | -0.003 ±<br>0.005   | -0.003 ±<br>0.005                                  | -0.004 ±<br>0.005                                   |
| m/z<br>85.06795 | C <sub>5</sub> H <sub>9</sub> O                | cyclopenta<br>none<br>(Mancuso<br>et al.,<br>2015)      | 3.122 | 0.001 ±<br>0.004                                    | -0.002 ±<br>0.003                                   | -0.001 ±<br>0.006   | 0.001 ±<br>0.003                                   | -4.375 10 <sup>-4</sup> ±<br>0.005                  |
| m/z<br>86.02312 | C <sub>3</sub> H <sub>4</sub> NO <sub>2</sub>  | cyano<br>acetic acid                                    | 3.813 | -1.732 10 <sup>-4</sup> ±<br>2.774 10 <sup>-4</sup> | -1.734 10 <sup>-4</sup> ±<br>2.683 10 <sup>-4</sup> | 5.366E-03±<br>0.008 | 2.036 10 <sup>-4</sup> ±<br>2.905 10 <sup>-4</sup> | -2.169 10 <sup>-4</sup> ±<br>3.028 10 <sup>-4</sup> |
| m/z<br>87.04397 | C <sub>4</sub> H <sub>7</sub> O <sub>2</sub>   | 2,3-<br>butadione<br>(Sarkar et<br>al., 2016)           | 2.446 | -0.005 ±<br>0.013                                   | -0.013 ±<br>0.014                                   | -0.011 ±<br>0.018   | -0.008 ±<br>0.011                                  | -0.013 ±<br>0.015                                   |
| m/z<br>87.08134 | C <sub>5</sub> H <sub>11</sub> O               | MBO                                                     | 3.124 | 0.001 ±<br>0.002                                    | 2.40 10 <sup>-4</sup> ±<br>0.001                    | 0.002 ±<br>0.005    | 0.003 ±<br>0.005                                   | 0.001 ±<br>0.002                                    |
| m/z<br>93.07393 | C <sub>7</sub> H <sub>9</sub>                  | toluene                                                 | 2.057 | -0.014 ±<br>0.014                                   | -0.012 ±<br>0.013                                   | -0.011 ±<br>0.012   | -0.013 ±<br>0.014                                  | -0.013 ±<br>0.014                                   |
| m/z<br>95.02947 | C <sub>2</sub> H <sub>7</sub> O <sub>4</sub>   | dioxybism<br>ethanol<br>(Meischne<br>r et al.,<br>2022) | 3.122 | 0.007 ±<br>0.016                                    | -0.002 ±<br>0.003                                   | -0.001 ±<br>0.004   | 0.005 ±<br>0.011                                   | -0.002 ±<br>0.003                                   |
| m/z<br>97.03481 | C <sub>4</sub> H <sub>5</sub> N <sub>2</sub> O | -                                                       | 3.025 | -0.002 ±<br>0.003                                   | -0.003 ±<br>0.003                                   | -0.003 ±<br>0.003   | -0.003 ±<br>0.003                                  | -0.003±<br>0.004                                    |



|                 |                                               |                                                                   |       |                                                     |                                                     |                                   |                   |                                                     |
|-----------------|-----------------------------------------------|-------------------------------------------------------------------|-------|-----------------------------------------------------|-----------------------------------------------------|-----------------------------------|-------------------|-----------------------------------------------------|
| m/z<br>98.02441 | C <sub>4</sub> H <sub>4</sub> NO <sub>2</sub> | 1H-pyrrole-2,5-dione                                              | 3.842 | -4.702 10 <sup>-4</sup><br>±0.001                   | -4.878 10 <sup>-4</sup><br>±0.001                   | 0.028 ±<br>0.004                  | 0.017 ±<br>0.004  | -4.840 10 <sup>-4</sup> ±<br>0.001                  |
| m/z<br>99.05189 | C <sub>5</sub> H <sub>7</sub> O <sub>2</sub>  | -                                                                 | 2.507 | -0.003 ±<br>0.005                                   | -0.005 ±<br>0.007                                   | -0.004 ±<br>0.006                 | -0.004 ±<br>0.007 | -0.005 ±<br>0.007                                   |
| m/z<br>100.0365 | C <sub>4</sub> H <sub>6</sub> NO <sub>2</sub> | -                                                                 | 3.851 | -0.001 ±<br>0.001                                   | -0.001 ±<br>0.001                                   | 0.003 ±<br>0.004                  | 0.002±<br>0.003   | -0.001±<br>0.001                                    |
| m/z<br>101.0686 | C <sub>5</sub> H <sub>9</sub> O <sub>2</sub>  | 2,3-Pentanedione or acetyl acetone or 2-butenic acid methyl ester | 2.523 | 0.011 ±<br>0.021                                    | 0.001 ±<br>0.009                                    | 0.024 ±<br>0.041                  | 0.012 ±<br>0.020  | 0.009 ±<br>0.020                                    |
| m/z<br>103.0410 | C <sub>4</sub> H <sub>7</sub> O <sub>3</sub>  | propylene Carbonate                                               | 3.111 | -0.003 ±<br>0.003                                   | -0.003 ±<br>0.003                                   | -0.002 ±<br>0.003                 | -0.003 ±<br>0.003 | -0.003 ±<br>0.003                                   |
| m/z<br>107.0938 | C <sub>8</sub> H <sub>11</sub>                | xylene                                                            | 2.182 | -0.002 ±<br>0.003                                   | -0.003 ±<br>0.004                                   | -0.003 ±<br>0.004                 | -0.003 ±<br>0.003 | -0.004 ±<br>0.004                                   |
| m/z<br>111.0457 | C <sub>6</sub> H <sub>7</sub> O <sub>2</sub>  | -                                                                 | 2.572 | -0.002 ±<br>0.003                                   | -0.004 ±<br>0.004                                   | -0.004 ±<br>0.004                 | -0.002 ±<br>0.004 | -0.003 ±<br>0.004                                   |
| m/z<br>113.0216 | C <sub>5</sub> H <sub>5</sub> O <sub>3</sub>  | -                                                                 | 3.121 | -0.002 ±<br>0.004                                   | -0.004 ±<br>0.004                                   | -0.004 ±<br>0.005                 | -0.003 ±<br>0.004 | -0.004 ±<br>0.004                                   |
| m/z<br>115.0781 | C <sub>6</sub> H <sub>11</sub> O <sub>2</sub> | -                                                                 | 2.605 | 7.974×10 <sup>-4</sup><br>± 0.003                   | -8.437 10 <sup>-4</sup> ±<br>0.002                  | 3.853 10 <sup>-4</sup> ±<br>0.002 | 0.003 ±<br>0.004  | -2.147 10 <sup>-4</sup> ±<br>0.003                  |
| m/z<br>116.0409 | C <sub>4</sub> H <sub>6</sub> NO <sub>3</sub> | 3-Methyl-2,5-oxazolidine-dione                                    | 3.101 | -1.218 10 <sup>-4</sup><br>± 3.445 10 <sup>-4</sup> | -2.168 10 <sup>-4</sup> ±<br>3.162 10 <sup>-4</sup> | 0.008 ±<br>0.012                  | 0.004 ±<br>0.005  | -2.448 10 <sup>-4</sup> ±<br>3.125 10 <sup>-4</sup> |
| m/z<br>129.098  | C <sub>7</sub> H <sub>13</sub> O <sub>2</sub> | cyclohexanecarboxylic acid - CHC acid                             | 2.685 | -4.928 10 <sup>-4</sup><br>± 0.002                  | -6.588 10 <sup>-4</sup><br>±0.002                   | 0.008 ±<br>0.015                  | 0.003 ±<br>0.005  | -0.002 ±<br>0.003                                   |

|                 |                                                |                                                    |       |                                    |                                    |                                    |                   |                                                     |
|-----------------|------------------------------------------------|----------------------------------------------------|-------|------------------------------------|------------------------------------|------------------------------------|-------------------|-----------------------------------------------------|
| m/z<br>129.1315 | C <sub>8</sub> H <sub>16</sub> O               | octanal or<br>octanone<br>or 1-octen-<br>3-ol, ... | 2.175 | 0.003 ±<br>0.004                   | 0.002 ±<br>0.003                   | 6.275 10 <sup>-4</sup> ±<br>0.002  | 0.005 ±<br>0.008  | 0.002 ±<br>0.005                                    |
| m/z<br>137.1397 | C <sub>10</sub> H <sub>17</sub>                | monoterpe<br>nes                                   | 2.433 | -0.007 ±<br>0.016                  | -0.007 ±<br>0.015                  | -0.007 ±<br>0.016                  | -0.006 ±<br>0.015 | 0.026 ±<br>0.043                                    |
| m/z<br>139.0844 | C <sub>8</sub> H <sub>11</sub> O <sub>2</sub>  | p-creosol                                          | 2.741 | 0.007 ±<br>0.013                   | -7.802 10 <sup>-4</sup> ±<br>0.002 | 7.082 10 <sup>-4</sup> ±<br>0.002  | 0.003 ±<br>0.007  | 0.004 ±<br>0.014                                    |
| m/z<br>139.129  | C <sub>10</sub> H <sub>19</sub>                | -                                                  | 2.453 | -0.002<br>±0.002                   | -5.206 10 <sup>-4</sup> ±<br>0.002 | 3.961 10 <sup>-4</sup> ±<br>0.002  | 0.002 ±<br>0.003  | -0.003 ±<br>0.003                                   |
| m/z<br>153.1204 | C <sub>10</sub> H <sub>17</sub> O              | oxygenate<br>d<br>monoterpe<br>nes                 | 3.247 | -4.447 10 <sup>-4</sup><br>± 0.002 | -5.383 10 <sup>-4</sup> ±<br>0.002 | 0.002 ±<br>0.002                   | 0.003 ±<br>0.003  | -0.002 ±<br>0.002                                   |
| m/z<br>157.1471 | C <sub>10</sub> H <sub>20</sub> O              | -                                                  | 3.946 | 0.003 ±<br>0.005                   | 2.378 10 <sup>-4</sup> ±<br>0.003  | -4.986 10 <sup>-4</sup> ±<br>0.004 | 0.001 ±<br>0.004  | -0.002 ±<br>0.004                                   |
| m/z<br>205.1848 | C <sub>15</sub> H <sub>25</sub>                | sesquiterp<br>enes                                 | 2.909 | 4.282 10 <sup>-5</sup> ±<br>0.002  | 0.002 ±<br>0.002                   | 0.006 ±<br>0.016                   | 0.007 ±<br>0.008  | 6.952 10 <sup>-4</sup> ±<br>0.002                   |
| m/z<br>215.1319 | C <sub>15</sub> H <sub>19</sub> O              | lindestrene                                        | 3.493 | 0.002 ±<br>0.003                   | 0.003 ±<br>0.007                   | 0.025 ±<br>0.054                   | 0.002 ±<br>0.004  | -5.369 10 <sup>-4</sup> ±<br>8.963 10 <sup>-4</sup> |
| m/z<br>279.1614 | C <sub>16</sub> H <sub>23</sub> O <sub>4</sub> | dibutyl<br>phthalate                               | 3.805 | -0.003 ±<br>0.005                  | 0.007 ±<br>0.021                   | 0.008 ±<br>0.017                   | 0.013 ±<br>0.022  | 0.008 ±<br>0.021                                    |

**Table S4.** VOCs targeted in our study and mean fluxes ± std in each chamber with bare soil, and different amount of masses.

24  
25  
26
