# Supplementary material for: Is litter biomass a driver of soil volatile organic compound fluxes in Mediterranean forest?
Source: Copernicus journal article supplement (doi:10.5194/bg-22-3661-2025), 2025-07-29
Supplement: Supplementary file 2 [file bg-22-3661-2025-supplement.zip]

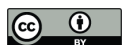

## *Supplement of*

# **Is litter biomass a driver of soil volatile organic compound fluxes in Mediterranean forest?**

**Manon Rocco et al.**

*Correspondence to:* Manon Rocco ([manon.rocco@univ-amu.fr](mailto:manon.rocco@univ-amu.fr))

- [bg-22-3661-2025-supplement-title-page.pdf](#)
- Supplementary material
  - [Rocco et al\\_Supplementary\\_biogeosciences\\_2025\\_review\\_VF2.pdf](#)
  - [S1.xlsx](#)
  - [S2.xlsx](#)
  - [S3.xlsx](#)

The copyright of individual parts of the supplement might differ from the article licence.
