# Supplementary material for: Is litter biomass a driver of soil volatile organic compound fluxes in Mediterranean forest?
Source: Copernicus journal article supplement (doi:10.5194/bg-22-3661-2025), 2025-07-29
Supplement: Supplementary file 3 [file S2.xlsx]

## Sheet: category_attribution
Compounds	Formula [COV]	Emitted/uptake/both	Emitted	Immission	Both
formaldehyde	C1H2O1	U	0	1	0
methanol	C1H4O1	B	0	0	1
acetonitrile	C2H3N1	U	0	1	0
	C3H6	B	0	0	1
acetaldehyde	C2H3O1	U	0	1	0
	C1H2O2	U	0	1	0
	C2H6O1	U	0	1	0
	C4H4	U	0	1	0
	C3H5N1	E	1	0	0
acrolein	C3H4O1	B	0	0	1
acetone	C3H6O1	B	0	0	1
acetic acid	C2H4O2	U	0	1	0
	C1H3N1O2	U	0	1	0
	C5H8	U	0	1	0
	C4H7N1	U	0	1	0
	C4H6O1	U	0	1	0
	C3H6O2	U	0	1	0
	C6H4	U	0	1	0
	C6H6	B	0	0	1
	C4H4S1	B	0	0	1
	C5H8O1	U	0	1	0
	C3H3N1O2	E	1	0	0
	C4H6O2	U	0	1	0
	C5H10O1	B	0	0	1
	C7H8	U	0	1	0
	C2H6O4	E	1	0	0
	C4H4N2O1	U	0	1	0
	C4H3N1O2	B	0	0	1
	C5H6O2	E	1	0	0
	C4H5N1O2	U	0	1	0
	C4H6O3	U	0	1	0
	C8H10	U	0	1	0
	C6H6O2	U	0	1	0
	C5H4O3	B	0	0	1
	C7H14O1	B	0	0	1
	C9H13	B	0	0	1
CHC acid	C7H12O2	E	1	0	0
	C8H16O1	U	0	1	0
	C10H16	B	0	0	1
	C8H10O2	B	0	0	1
	C11H18	B	0	0	1
oxygenated monoterpenes	C10H16O1	B	0	0	1
	C10H14O2	E	1	0	0
	C15H24	E	1	0	0
lindestrene	C15H18O1	B	0	0	1
dibutyl phthalate	C16H21O4	B	0	0	1
			7	22	17	46
			0.152174	0.478261	0.369565

## Sheet: Avg_fluxes
	nb		x	Flux1	Flux2	Flux3	Flux4	Fluxsol	sd1	sd2	sd3	sd4	sd_sol	category	mean_flux_liiter	mean_std_litter	Fluxsol	sd_sol	r	p
1	1	formaldehyde	C1H2O1	-0.0311244	-0.037291	-0.0311889	-0.0330318	-0.0439565	0.0359727	0.0402618	0.0381076	0.0361812	0.0471598	U	-0.033159	0.0376308	-0.0439565	0.0471598
2	2	methanol	C1H4O1	-0.318876	-0.239506	0.100443	-0.183316	-0.59387	0.433124	0.379468	1.79493	0.395805	0.498641	B	-0.160314	0.750831	-0.59387	0.498641	0.45	0.093
3	3	acetonitrile	C2H3N1	-0.0377101	-0.0378001	-0.037558	-0.0374014	-0.039461	0.0395093	0.0395522	0.0392574	0.0392432	0.04104	U	-0.0376174	0.0393905	-0.039461	0.04104
4	4		C3H6	0.00583267	-0.0156876	-0.00402154	0.0270318	-0.0250613	0.0348846	0.0227332	0.0371612	0.0470728	0.0283604	B	0.00328885	0.0354629	-0.0250613	0.0283604
5	5	acetaldehyde	C2H3O1	0.00596427	0.342916	-0.0586172	-0.065979	0.185534	0.125044	0.379289	0.181168	0.0837693	0.226011	U	0.0560709	0.192318	0.185534	0.226011	-0.61	0.015
6	6		C1H2O2	-0.0741177	-0.0878482	-0.0754454	-0.0900888	-0.0891947	0.0933509	0.100475	0.0956875	0.105354	0.10455	U	-0.081875	0.0987167	-0.0891947	0.10455
7	7		C2H6O1	-0.023699	-0.0258706	-0.0197509	-0.0263147	-0.0271849	0.0320026	0.0398839	0.0292482	0.0406345	0.0404419	U	-0.0239088	0.0354423	-0.0271849	0.0404419
8	8		C4H4	-0.00402059	-0.00481646	-0.00439024	-0.00400542	-0.00502823	0.00463964	0.00518635	0.00516497	0.00449225	0.00539023	U	-0.00430818	0.0048708	-0.00502823	0.00539023
9	9		C3H5N1	-0.00495026	-0.00534031	-0.00513181	-0.0049482	-0.0054002	0.00579248	0.00606119	0.00584507	0.00575942	0.00607261	E	-0.00509264	0.00586454	-0.0054002	0.00607261
10	10	acrolein	C3H4O1	0.0151473	0.00671569	0.010659	0.0135111	0.00615553	0.0362535	0.0300252	0.037012	0.0286544	0.0282501	B	0.0115083	0.0329863	0.00615553	0.0282501	0.19	0.501
11	11	acetone	C3H6O1	-0.156827	-0.0486107	0.0827083	0.196917	-0.216992	0.172943	0.0841413	0.271074	0.252247	0.21973	B	0.0185469	0.195101	-0.216992	0.21973	0.94	0
12	12	acetic acid	C2H4O2	-0.0643079	-0.113308	-0.111864	-0.0618662	-0.0960263	0.12494	0.121571	0.122149	0.0923176	0.117422	U	-0.0878366	0.115244	-0.0960263	0.117422	0.06	0.824
13	13		C1H3N1O2	-0.00121968	-0.00203679	-0.00216283	-0.000743196	-0.00193514	0.00206578	0.00222064	0.00234968	0.00145183	0.00224653	U	-0.00154062	0.00202198	-0.00193514	0.00224653
14	14	isoprene	C5H8	-0.038331	-0.0625635	-0.0590781	-0.0324228	-0.0821402	0.09988	0.104658	0.124279	0.0939615	0.128389	U	-0.0480988	0.105694	-0.0821402	0.128389	0.36	0.189
15	15		C4H7N1	-0.00118804	-0.00192326	-0.00178062	-0.000985516	-0.002549	0.00280681	0.00302929	0.00355601	0.00262626	0.00373847	U	-0.00146936	0.00300459	-0.002549	0.00373847
16	16		C4H6O1	-0.0128763	-0.0179081	-0.0161473	-0.0167852	-0.0200143	0.0204685	0.0245984	0.0271222	0.023955	0.0272483	U	-0.0159292	0.024036	-0.0200143	0.0272483
17	17		C3H6O2	-0.00227377	-0.0146572	-0.0206402	-0.00615738	-0.0171166	0.0273375	0.016112	0.0225821	0.0226212	0.0186334	U	-0.0109321	0.0221632	-0.0171166	0.0186334
18	18		C6H4	-0.00148842	-0.00145775	-0.00116248	-0.000563972	-0.00201747	0.00180869	0.00183401	0.00162077	0.00159209	0.00230704	U	-0.00116815	0.00171389	-0.00201747	0.00230704
19	19		C6H6	-0.00415881	-0.00376918	-0.00398927	-0.00407469	-0.00459882	0.00443651	0.00423794	0.00446173	0.00443919	0.00558424	B	-0.00399799	0.00439384	-0.00459882	0.00558424
20	20		C4H4S1	-0.00276904	-0.0031136	-0.00350137	-0.00353697	-0.00414889	0.00437936	0.00435018	0.00481426	0.0048502	0.00513915	B	-0.00323025	0.0045985	-0.00414889	0.00513915
21	21		C5H8O1	0.000544107	-0.00249361	-0.000866871	0.000470281	-0.000333835	0.00428296	0.00339324	0.00630744	0.00303129	0.00462963	U	-0.000586522	0.00425373	-0.000333835	0.00462963
22	22		C3H3N1O2	-0.000170825	-0.000167098	0.00541399	0.000200344	-0.000214677	0.000277197	0.000265823	0.00760173	0.00028608	0.00030088	E	0.0013191	0.00210771	-0.000214677	0.00030088
23	23		C4H6O2	-0.00504846	-0.0131578	-0.0108577	-0.00779062	-0.0122151	0.0128035	0.0145914	0.0179193	0.0110703	0.0149277	U	-0.00921364	0.0140961	-0.0122151	0.0149277
24	24		C5H10O1	0.000717104	0.000211502	0.002112	0.0033151	0.000974534	0.00219906	0.00102892	0.00535135	0.00471859	0.00213488	B	0.00158893	0.00332448	0.000974534	0.00213488
25	25		C7H8	-0.0142687	-0.0137626	-0.0118806	-0.0145912	-0.0147951	0.0151444	0.0167521	0.0134315	0.0172655	0.0175917	U	-0.0136258	0.0156484	-0.0147951	0.0175917
26	26		C2H6O4	0.00764566	-0.00152087	-0.00111749	0.00723337	-0.00139963	0.0160606	0.00319912	0.00349963	0.0215793	0.00298535	E	0.00306017	0.0110847	-0.00139963	0.00298535
27	27		C4H4N2O1	-0.00237906	-0.0027226	-0.0030438	-0.00261467	-0.00335365	0.00286418	0.00299277	0.00343261	0.0030781	0.00364323	U	-0.00269003	0.00309191	-0.00335365	0.00364323
28	28		C4H3N1O2	-0.000468255	-0.000490933	0.0284371	0.0165116	-0.000460927	0.000545077	0.00054933	0.0383169	0.0186085	0.000559452	B	0.0109974	0.014505	-0.000460927	0.000559452
29	29		C5H6O2	-0.00340562	-0.00597245	-0.00415801	-0.00501683	-0.00506872	0.00491611	0.0086417	0.00672039	0.00783949	0.00703424	E	-0.00463823	0.00702942	-0.00506872	0.00703424
30	30		C4H5N1O2	-0.000765957	-0.000895411	0.00273799	0.00204278	-0.000912378	0.000896022	0.00103798	0.00435088	0.0029776	0.00103387	U	0.000779851	0.00231562	-0.000912378	0.00103387
31	31		C4H6O3	-0.00276697	-0.00304717	-0.00258141	-0.00325603	-0.0031237	0.00351898	0.00416772	0.00329027	0.00441449	0.00401054	U	-0.00291289	0.00384786	-0.0031237	0.00401054
32	32		C8H10	-0.00194974	-0.00290895	-0.00291022	-0.00263872	-0.00402088	0.00307216	0.00412174	0.00401715	0.00363664	0.0045863	U	-0.00260191	0.00371192	-0.00402088	0.0045863
33	33		C6H6O2	-0.00137745	-0.0039303	-0.00373067	-0.00173642	-0.00198471	0.00301657	0.00408487	0.00400113	0.00366373	0.0073115	U	-0.00269371	0.00369157	-0.00198471	0.0073115
34	34		C5H4O3	-0.00163483	-0.00371096	-0.00412609	-0.00209402	-0.00360955	0.00414133	0.00407846	0.00472091	0.00469501	0.00413775	B	-0.00289147	0.00440893	-0.00360955	0.00413775
35	35		C7H14O1	-0.0001201	-0.000212866	0.00812952	0.00440895	-0.000228884	0.000343776	0.000317044	0.0123098	0.00510169	0.000318791	B	0.00305138	0.00451809	-0.000228884	0.000318791
36	36		C9H13	-0.000749953	0.0009984	0.00606604	0.00357002	-0.00107451	0.00201512	0.00295937	0.0111583	0.00550477	0.00132699	B	0.00247113	0.00540938	-0.00107451	0.00132699
37	37	CHC acid	C7H12O2	-0.000485273	-0.000672776	0.00882265	0.0029947	-0.0022593	0.0015752	0.00117061	0.0157394	0.00492178	0.00288259	E	0.00266482	0.00585175	-0.0022593	0.00288259
38	38		C8H16O1	0.00277498	0.0010883	0.000670403	0.00476865	0.00182399	0.00373487	0.00292304	0.00219802	0.00837389	0.00443605	U	0.00232558	0.00430745	0.00182399	0.00443605
39	39		C10H16	-0.00781181	-0.0069802	-0.00769621	-0.00600837	0.0261017	0.0155523	0.0150822	0.0159124	0.0146941	0.0425285	B	-0.00712415	0.0153102	0.0261017	0.0425285
40	40	creosol	C8H10O2	0.00800975	-0.000818927	0.00072827	0.00373525	0.00461831	0.0130781	0.00154492	0.00193384	0.0081679	0.0144143	B	0.00291359	0.00618118	0.00461831	0.0144143
41	41		C11H18	-0.000929572	-0.00224352	-0.000913703	0.000647608	-0.00268254	0.00349572	0.00699267	0.00397221	0.00654546	0.00665367	B	-0.000859797	0.00525151	-0.00268254	0.00665367
42	42	oxygenated monoterpenes	C10H16O1	-0.000451243	-0.000579186	0.00125311	0.00227483	-0.00116915	0.00120315	0.00129679	0.00224312	0.00315341	0.0016015	B	0.000624378	0.00197412	-0.00116915	0.0016015
43	43		C10H14O2	0.00288141	-0.00167227	-0.00104676	-0.000593346	-0.00185588	0.00366518	0.00334944	0.00226244	0.00265768	0.0030497	E	-0.000107744	0.00298369	-0.00185588	0.0030497
44	44		C15H24	8.36103e-05	0.00144452	0.0060161	0.00719403	0.00079229	0.00125306	0.00244356	0.0160004	0.00842499	0.00184988	E	0.00368457	0.00703051	0.00079229	0.00184988
45	45		C15H18O1	0.00143693	0.00355731	0.0253032	0.00218952	-0.000599453	0.00306884	0.00712891	0.0540685	0.00385234	0.000909174	B	0.00812175	0.0170296	-0.000599453	0.000909174
46	46	dibutyl phthalate	C16H21O4	-0.0026226	0.00762737	0.00921914	0.0130676	0.00831983	0.00524896	0.0215176	0.0179708	0.0222587	0.0206312	B	0.00682288	0.016749	0.00831983	0.0206312
			-0.565215	-0.776306	-0.426911	-0.21264	-0.306477	-1.10374
			0.369104
