# Supplementary material for: Is litter biomass a driver of soil volatile organic compound fluxes in Mediterranean forest?
Source: Copernicus journal article supplement (doi:10.5194/bg-22-3661-2025), 2025-07-29
Supplement: Supplementary file 4 [file S3.xlsx]

## Sheet: r
	masses	litterRH	actino	gram_neg	gram_pos	AM_fungi	fungi	temperature	humidity	formaldehyde	methanol	acetonitrile	acetaldehyde	formic.acid	creosol	acetic.acid	propanoic.acid	ethanol	toluene	propanenitrile	CHC.acid	acetone	acrolein	dibutyl.phthalate	X1H.pyrrole.2.5.dione	sesquiterpenes	lindestrene	isoprene	MACR.MVK.ISOPOOH	monoterpenes
masses	1	0.410837	0.444077	0.452437	0.424033	-0.634811	0.584291	0.0312016	-0.185203	0.177778	0.212897	0.0678693	-0.370357	0.0487563	-0.130399	0.061481	0.0241849	0.0513544	0.0443721	0.0719281	0.472856	0.630653	0.0637012	0.142474	0.515042	0.36843	0.219484	0.123634	0.0257052	-0.354281
litterRH	0.410837	1	0.548815	0.372837	0.290432	-0.653972	0.287759	-0.0716794	0.0910946	0.0521051	0.151924	-0.130649	-0.212545	-0.0336869	-0.0845697	0.0325992	0.0299713	0.0857774	-0.00366393	-0.0284112	0.0337868	0.232424	0.0824909	-0.0421381	0.127466	0.0746818	-0.0595	0.180608	0.0964812	-0.37663
actino	0.444077	0.548815	1	0.816699	0.566372	-0.554912	0.680152	0.0825409	-0.136207	0.118637	0.187207	0.149451	0.0353804	0.039234	-0.211234	0.0113198	-0.0157814	0.0861171	0.0464634	0.0995549	0.161624	0.336769	0.017196	0.18833	0.275083	0.180166	0.145243	0.0258824	-0.0165441	-0.308329
gram_neg	0.452437	0.372837	0.816699	1	0.838945	-0.522859	0.797796	0.0803107	-0.16633	0.185838	0.112201	0.249762	-0.0514023	0.102694	-0.141426	0.0762545	0.0779185	-0.18141	-0.0336777	0.0621994	0.20442	0.347813	-0.0235303	0.182379	0.189596	0.176416	0.16422	0.123674	0.00281509	-0.234489
gram_pos	0.424033	0.290432	0.566372	0.838945	1	-0.520084	0.740554	0.154164	-0.27098	0.267073	0.197538	0.319695	-0.138089	0.140163	-0.0185687	0.166724	0.172675	-0.0957196	-0.0087943	0.146524	0.32978	0.313593	0.0377517	0.118869	0.32313	0.178268	0.24578	0.10452	0.0284187	-0.229856
AM_fungi	-0.634811	-0.653972	-0.554912	-0.522859	-0.520084	1	-0.65199	0.00229651	0.0998903	-0.215779	-0.220414	-0.110451	0.155984	-0.0913284	0.1325	-0.0296762	-0.0660696	0.026371	0.00902478	-0.0671031	-0.307338	-0.388241	-0.058067	0.0382653	-0.298063	-0.170937	-0.181065	-0.135911	-0.0645099	0.477213
fungi	0.584291	0.287759	0.680152	0.797796	0.740554	-0.65199	1	0.119951	-0.258462	0.28565	0.169003	0.35144	-0.0661169	0.139326	-0.0450357	0.181327	0.224153	-0.0605699	-0.000938416	0.146363	0.305629	0.46596	0.0198123	0.139818	0.285542	0.238477	0.218998	0.106031	0.0038117	-0.333239
temperature	0.0312016	-0.0716794	0.0825409	0.0803107	0.154164	0.00229651	0.119951	1	-0.848445	-0.0173541	0.581199	0.502161	0.507376	-0.431273	0.406759	0.202851	0.317349	0.429431	0.305205	0.593446	0.28833	0.418608	0.372268	0.543084	0.523267	0.610087	0.514902	-0.350831	-0.237171	0.178691
humidity	-0.185203	0.0910946	-0.136207	-0.16633	-0.27098	0.0998903	-0.258462	-0.848445	1	-0.233739	-0.747671	-0.555063	-0.369325	0.231698	-0.264775	-0.234046	-0.341882	-0.368844	-0.318246	-0.53876	-0.511763	-0.618573	-0.387883	-0.485127	-0.719718	-0.765108	-0.800388	0.122157	0.0406448	-0.0478765
formaldehyde	0.177778	0.0521051	0.118637	0.185838	0.267073	-0.215779	0.28565	-0.0173541	-0.233739	1	0.535276	0.504306	0.065712	0.808919	-0.0410671	0.693842	0.610269	0.172517	0.474414	0.222911	0.276768	0.572465	0.114471	0.043346	0.218208	0.201811	0.329843	0.778874	0.811712	-0.164784
methanol	0.212897	0.151924	0.187207	0.112201	0.197538	-0.220414	0.169003	0.581199	-0.747671	0.535276	1	0.354203	0.298535	0.1157	0.0759593	0.366822	0.392813	0.560836	0.556042	0.519009	0.3804	0.655316	0.479124	0.358844	0.663723	0.706269	0.741892	0.275854	0.451841	-0.0652166
acetonitrile	0.0678693	-0.130649	0.149451	0.249762	0.319695	-0.110451	0.35144	0.502161	-0.555063	0.504306	0.354203	1	0.403556	0.142732	0.350661	0.545257	0.598383	0.117482	0.390913	0.547071	0.334402	0.578387	0.0933081	0.465767	0.27932	0.328213	0.304573	0.0946903	0.121083	0.0770529
acetaldehyde	-0.370357	-0.212545	0.0353804	-0.0514023	-0.138089	0.155984	-0.0661169	0.507376	-0.369325	0.065712	0.298535	0.403556	1	-0.15974	0.230185	0.216534	0.34119	0.355795	0.385706	0.394109	-0.0666561	0.14013	0.194921	0.282511	-0.116265	0.210009	0.181408	-0.218693	-0.0375768	0.222561
formic acid	0.0487563	-0.0336869	0.039234	0.102694	0.140163	-0.0913284	0.139326	-0.431273	0.231698	0.808919	0.1157	0.142732	-0.15974	1	-0.271032	0.488268	0.351591	-0.0741373	0.198687	-0.0347417	0.00605538	0.167866	-0.0546451	-0.208158	-0.0991642	-0.193783	-0.0315492	0.752878	0.738669	-0.156938
creosol	-0.130399	-0.0845697	-0.211234	-0.141426	-0.0185687	0.1325	-0.0450357	0.406759	-0.264775	-0.0410671	0.0759593	0.350661	0.230185	-0.271032	1	0.406667	0.43959	0.175659	0.157136	0.288385	0.103051	0.11705	0.171845	0.339748	-0.0114534	0.142713	0.0148337	-0.175188	-0.183284	0.237236
acetic acid	0.061481	0.0325992	0.0113198	0.0762545	0.166724	-0.0296762	0.181327	0.202851	-0.234046	0.693842	0.366822	0.545257	0.216534	0.488268	0.406667	1	0.879062	0.276212	0.482706	0.35967	0.13032	0.471922	0.220341	0.30588	0.0521094	0.126406	0.0550997	0.513372	0.484725	0.00958159
propanoic acid	0.0241849	0.0299713	-0.0157814	0.0779185	0.172675	-0.0660696	0.224153	0.317349	-0.341882	0.610269	0.392813	0.598383	0.34119	0.351591	0.43959	0.879062	1	0.217613	0.45379	0.557823	0.105406	0.467137	0.299545	0.240617	0.093881	0.169487	0.0640618	0.378044	0.401542	-0.00291406
ethanol	0.0513544	0.0857774	0.0861171	-0.18141	-0.0957196	0.026371	-0.0605699	0.429431	-0.368844	0.172517	0.560836	0.117482	0.355795	-0.0741373	0.175659	0.276212	0.217613	1	0.643311	0.376646	0.12533	0.261077	0.290563	0.284112	0.364351	0.221962	0.229612	-0.065046	0.199097	-0.0417196
toluene	0.0443721	-0.00366393	0.0464634	-0.0336777	-0.0087943	0.00902478	-0.000938416	0.305205	-0.318246	0.474414	0.556042	0.390913	0.385706	0.198687	0.157136	0.482706	0.45379	0.643311	1	0.463895	0.235937	0.396434	0.272496	0.302944	0.199765	0.210171	0.177217	0.282375	0.558282	0.168988
propanenitrile	0.0719281	-0.0284112	0.0995549	0.0621994	0.146524	-0.0671031	0.146363	0.593446	-0.53876	0.222911	0.519009	0.547071	0.394109	-0.0347417	0.288385	0.35967	0.557823	0.376646	0.463895	1	0.193486	0.382455	0.46113	0.375012	0.40575	0.374382	0.22591	-0.151115	0.067993	0.0595995
CHC acid	0.472856	0.0337868	0.161624	0.20442	0.32978	-0.307338	0.305629	0.28833	-0.511763	0.276768	0.3804	0.334402	-0.0666561	0.00605538	0.103051	0.13032	0.105406	0.12533	0.235937	0.193486	1	0.619502	0.126664	0.335317	0.547411	0.475161	0.632287	0.072006	0.0577344	-0.138553
acetone	0.630653	0.232424	0.336769	0.347813	0.313593	-0.388241	0.46596	0.418608	-0.618573	0.572465	0.655316	0.578387	0.14013	0.167866	0.11705	0.471922	0.467137	0.261077	0.396434	0.382455	0.619502	1	0.263485	0.482176	0.590024	0.66281	0.590832	0.334063	0.290296	-0.162136
acrolein	0.0637012	0.0824909	0.017196	-0.0235303	0.0377517	-0.058067	0.0198123	0.372268	-0.387883	0.114471	0.479124	0.0933081	0.194921	-0.0546451	0.171845	0.220341	0.299545	0.290563	0.272496	0.46113	0.126664	0.263485	1	0.195253	0.294916	0.390057	0.299045	0.0398704	0.113799	0.0155392
dibutyl phthalate	0.142474	-0.0421381	0.18833	0.182379	0.118869	0.0382653	0.139818	0.543084	-0.485127	0.043346	0.358844	0.465767	0.282511	-0.208158	0.339748	0.30588	0.240617	0.284112	0.302944	0.375012	0.335317	0.482176	0.195253	1	0.296235	0.402079	0.309273	-0.114945	-0.127003	0.165349
1H-pyrrole-2,5-dione	0.515042	0.127466	0.275083	0.189596	0.32313	-0.298063	0.285542	0.523267	-0.719718	0.218208	0.663723	0.27932	-0.116265	-0.0991642	-0.0114534	0.0521094	0.093881	0.364351	0.199765	0.40575	0.547411	0.590024	0.294916	0.296235	1	0.572186	0.649478	-0.0724693	0.0315217	-0.151161
sesquiterpenes	0.36843	0.0746818	0.180166	0.176416	0.178268	-0.170937	0.238477	0.610087	-0.765108	0.201811	0.706269	0.328213	0.210009	-0.193783	0.142713	0.126406	0.169487	0.221962	0.210171	0.374382	0.475161	0.66281	0.390057	0.402079	0.572186	1	0.80651	-0.000815838	0.010659	0.00991022
lindestrene	0.219484	-0.0595	0.145243	0.16422	0.24578	-0.181065	0.218998	0.514902	-0.800388	0.329843	0.741892	0.304573	0.181408	-0.0315492	0.0148337	0.0550997	0.0640618	0.229612	0.177217	0.22591	0.632287	0.590832	0.299045	0.309273	0.649478	0.80651	1	0.0922487	0.140819	-0.0508494
isoprene	0.123634	0.180608	0.0258824	0.123674	0.10452	-0.135911	0.106031	-0.350831	0.122157	0.778874	0.275854	0.0946903	-0.218693	0.752878	-0.175188	0.513372	0.378044	-0.065046	0.282375	-0.151115	0.072006	0.334063	0.0398704	-0.114945	-0.0724693	-0.000815838	0.0922487	1	0.826481	-0.0937743
MACR/MVK/ISOPOOH	0.0257052	0.0964812	-0.0165441	0.00281509	0.0284187	-0.0645099	0.0038117	-0.237171	0.0406448	0.811712	0.451841	0.121083	-0.0375768	0.738669	-0.183284	0.484725	0.401542	0.199097	0.558282	0.067993	0.0577344	0.290296	0.113799	-0.127003	0.0315217	0.010659	0.140819	0.826481	1	-0.105378
monoterpenes	-0.354281	-0.37663	-0.308329	-0.234489	-0.229856	0.477213	-0.333239	0.178691	-0.0478765	-0.164784	-0.0652166	0.0770529	0.222561	-0.156938	0.237236	0.00958159	-0.00291406	-0.0417196	0.168988	0.0595995	-0.138553	-0.162136	0.0155392	0.165349	-0.151161	0.00991022	-0.0508494	-0.0937743	-0.105378	1

## Sheet: p_value
	masses	litterRH	actino	gram_neg	gram_pos	AM_fungi	fungi	temperature	humidity	formaldehyde	methanol	acetonitrile	acetaldehyde	formic.acid	creosol	acetic.acid	propanoic.acid	ethanol	toluene	propanenitrile	CHC.acid	acetone	acrolein	dibutyl.phthalate	X1H.pyrrole.2.5.dione	sesquiterpenes	lindestrene	isoprene	MACR.MVK.ISOPOOH	monoterpenes
masses	0	8.15129e-17	3.44025e-20	4.53663e-20	7.31752e-18	2.37885e-41	6.21556e-35	0.557646	0.000278769	0.0010261	3.84123e-05	0.161552	1.32846e-12	0.405543	0.0153841	0.249906	0.699193	0.282363	0.337764	0.157815	1.4709e-20	9.92292e-40	0.249446	0.00886251	2.73445e-25	1.92573e-12	4.11061e-05	0.0225158	0.622382	1.83829e-11
litterRH	8.15129e-17	0	8.77898e-30	2.8493e-13	1.91143e-08	1.08705e-44	9.45122e-09	0.147713	0.0880651	0.336032	0.00260274	0.0334525	5.04829e-05	0.473971	0.117473	0.471591	0.568866	0.104912	0.992602	0.701467	0.491314	4.2627e-06	0.117114	0.371092	0.0182279	0.167839	0.26015	0.000642933	0.0834571	7.08746e-13
actino	3.44025e-20	8.77898e-30	0	6.0259e-88	1.22567e-31	2.43512e-30	2.47681e-51	0.116428	0.0070875	0.0293074	0.000251195	0.00355971	0.654091	0.524422	7.70854e-05	0.793166	0.756253	0.0907772	0.34139	0.0516188	0.00246092	5.88049e-11	0.735525	0.000656734	1.34957e-07	0.000828816	0.00743744	0.578864	0.751786	5.73554e-09
gram_neg	4.53663e-20	2.8493e-13	6.0259e-88	0	4.02325e-96	2.36891e-26	4.23116e-82	0.133832	0.000866294	0.000394539	0.038284	4.36257e-06	0.220128	0.0456508	0.0093199	0.138831	0.157333	0.000533114	0.493024	0.267842	0.000122623	2.51258e-11	0.651227	0.000667397	0.000281056	0.000972336	0.00224464	0.0164261	0.910583	1.19224e-05
gram_pos	7.31752e-18	1.91143e-08	1.22567e-31	4.02325e-96	0	1.26331e-26	1.14235e-64	0.00284938	4.39385e-08	4.8704e-07	0.000204073	2.25145e-09	0.00414845	0.00864973	0.737667	0.00176193	0.00185463	0.0802066	0.875019	0.0068544	3.3995e-10	2.28661e-09	0.505834	0.0273369	2.4935e-10	0.000877798	4.02118e-06	0.0462079	0.574332	1.94374e-05
AM_fungi	2.37885e-41	1.08705e-44	2.43512e-30	2.36891e-26	1.26331e-26	0	3.51885e-45	0.984234	0.040212	5.36325e-05	1.86485e-05	0.0256546	0.00299567	0.0963721	0.0129815	0.544499	0.222041	0.666316	0.959921	0.181499	7.36936e-09	5.26779e-14	0.284451	0.423392	1.40622e-08	0.00165233	0.0008266	0.00896784	0.223544	7.56095e-21
fungi	6.21556e-35	9.45122e-09	2.47681e-51	4.23116e-82	1.14235e-64	3.51885e-45	0	0.0166932	1.5789e-07	6.08043e-08	0.001251	2.09407e-11	0.202505	0.00959923	0.397244	0.000661694	2.70127e-05	0.269497	0.964091	0.00591741	8.28478e-09	5.17241e-20	0.720754	0.0107536	5.94779e-08	8.49626e-06	4.42247e-05	0.0433995	0.912728	2.47996e-10
temperature	0.557646	0.147713	0.116428	0.133832	0.00284938	0.984234	0.0166932	0	3.51643e-99	0.559649	1.64751e-32	5.94545e-22	1.1761e-23	8.96529e-18	6.11958e-15	0.000290102	4.84221e-09	6.72974e-18	6.52809e-09	1.74154e-33	6.50614e-08	1.50489e-15	9.22232e-13	2.11827e-27	4.7897e-25	6.05978e-36	2.39719e-24	1.43333e-12	4.44308e-06	0.000951322
humidity	0.000278769	0.0880651	0.0070875	0.000866294	4.39385e-08	0.040212	1.5789e-07	3.51643e-99	0	2.40455e-05	6.39403e-63	1.37361e-28	1.8904e-12	8.34433e-06	7.29359e-07	1.61493e-05	1.10941e-10	7.15716e-13	1.23786e-09	2.63669e-27	4.20611e-24	2.761e-37	7.60725e-14	1.76994e-21	1.64498e-55	1.32269e-66	4.08158e-77	0.0131792	0.404418	0.376436
formaldehyde	0.0010261	0.336032	0.0293074	0.000394539	4.8704e-07	5.36325e-05	6.08043e-08	0.559649	2.40455e-05	0	8.17715e-26	7.64144e-23	0.32298	1.11438e-81	0.449599	4.3239e-51	1.38142e-36	0.00419819	8.99792e-20	4.24924e-05	2.23313e-07	1.07199e-30	0.0382934	0.42519	6.59166e-05	0.000174629	3.86095e-10	6.55597e-70	9.34997e-83	0.00217954
methanol	3.84123e-05	0.00260274	0.000251195	0.038284	0.000204073	1.86485e-05	0.001251	1.64751e-32	6.39403e-63	8.17715e-26	0	8.93443e-12	3.03592e-08	0.0575794	0.171645	2.95687e-12	6.56289e-14	1.50219e-30	8.38296e-30	1.38356e-25	3.00525e-13	6.56707e-44	4.05644e-21	1.56254e-11	7.72468e-45	1.3044e-52	1.25778e-60	7.89852e-07	3.30198e-18	0.230923
acetonitrile	0.161552	0.0334525	0.00355971	4.36257e-06	2.25145e-09	0.0256546	2.09407e-11	5.94545e-22	1.37361e-28	7.64144e-23	8.93443e-12	0	5.10196e-13	0.0135698	1.19414e-10	3.05916e-27	1.51321e-33	0.0162999	8.37001e-15	5.74329e-29	3.75247e-10	6.38734e-32	0.106389	4.42723e-18	2.77707e-07	1.26387e-09	1.83616e-08	0.0253613	0.0208707	0.161948
acetaldehyde	1.32846e-12	5.04829e-05	0.654091	0.220128	0.00414845	0.00299567	0.202505	1.1761e-23	1.8904e-12	0.32298	3.03592e-08	5.10196e-13	0	0.00167536	1.57557e-05	0.000147189	1.16297e-10	1.31509e-11	2.95337e-13	1.71034e-13	0.222026	0.0120311	0.000307704	7.83783e-08	0.0208188	8.60318e-05	0.000711079	1.49716e-05	0.434975	3.09781e-05
formic acid	0.405543	0.473971	0.524422	0.0456508	0.00864973	0.0963721	0.00959923	8.96529e-18	8.34433e-06	1.11438e-81	0.0575794	0.0135698	0.00167536	0	4.23734e-07	4.81848e-22	2.0006e-11	0.0725537	0.000662697	0.426732	0.953239	0.00317302	0.292402	0.000133376	0.062803	0.000305215	0.563475	1.37459e-61	1.41622e-60	0.00355476
creosol	0.0153841	0.117473	7.70854e-05	0.0093199	0.737667	0.0129815	0.397244	6.11958e-15	7.29359e-07	0.449599	0.171645	1.19414e-10	1.57557e-05	4.23734e-07	0	4.60668e-15	1.30747e-17	0.00148341	0.00463773	8.52621e-08	0.0558595	0.0320053	0.00138492	9.26322e-11	0.828495	0.00787326	0.782533	0.000994589	0.00063712	9.00258e-06
acetic acid	0.249906	0.471591	0.793166	0.138831	0.00176193	0.544499	0.000661694	0.000290102	1.61493e-05	4.3239e-51	2.95687e-12	3.05916e-27	0.000147189	4.81848e-22	4.60668e-15	0	6.5155e-112	5.80728e-07	7.43802e-21	7.2983e-12	0.0161352	1.6351e-20	3.72703e-05	9.3054e-09	0.347748	0.0194981	0.311912	3.44013e-24	7.00535e-22	0.865199
propanoic acid	0.699193	0.568866	0.756253	0.157333	0.00185463	0.222041	2.70127e-05	4.84221e-09	1.10941e-10	1.38142e-36	6.56289e-14	1.51321e-33	1.16297e-10	2.0006e-11	1.30747e-17	6.5155e-112	0	8.97687e-05	1.78737e-18	2.66234e-29	0.0519795	6.58849e-20	1.42463e-08	7.72246e-06	0.104316	0.0016639	0.239633	6.21417e-13	7.21563e-15	0.951622
ethanol	0.282363	0.104912	0.0907772	0.000533114	0.0802066	0.666316	0.269497	6.72974e-18	7.15716e-13	0.00419819	1.50219e-30	0.0162999	1.31509e-11	0.0725537	0.00148341	5.80728e-07	8.97687e-05	0	1.98653e-42	1.58767e-13	0.0189866	7.61496e-07	5.45345e-08	2.00927e-07	3.14972e-12	4.05281e-05	2.04114e-05	0.13755	0.000494708	0.454413
toluene	0.337764	0.992602	0.34139	0.493024	0.875019	0.959921	0.964091	6.52809e-09	1.23786e-09	8.99792e-20	8.38296e-30	8.37001e-15	2.95337e-13	0.000662697	0.00463773	7.43802e-21	1.78737e-18	1.98653e-42	0	2.16987e-20	9.39776e-06	1.10896e-14	4.58883e-07	2.42756e-08	0.000204618	0.000101882	0.00109757	1.85461e-07	6.13472e-29	0.00171238
propanenitrile	0.157815	0.701467	0.0516188	0.267842	0.0068544	0.181499	0.00591741	1.74154e-33	2.63669e-27	4.24924e-05	1.38356e-25	5.74329e-29	1.71034e-13	0.426732	8.52621e-08	7.2983e-12	2.66234e-29	1.58767e-13	2.16987e-20	0	0.000308416	1.17857e-13	2.3135e-19	2.36678e-12	6.52304e-15	1.11211e-12	2.75529e-05	0.00897267	0.21405	0.27327
CHC acid	1.4709e-20	0.491314	0.00246092	0.000122623	3.3995e-10	7.36936e-09	8.28478e-09	6.50614e-08	4.20611e-24	2.23313e-07	3.00525e-13	3.75247e-10	0.222026	0.953239	0.0558595	0.0161352	0.0519795	0.0189866	9.39776e-06	0.000308416	0	6.04642e-38	0.0201854	2.08068e-10	6.56033e-28	8.68433e-21	1.92427e-39	0.17889	0.288767	0.0107007
acetone	9.92292e-40	4.2627e-06	5.88049e-11	2.51258e-11	2.28661e-09	5.26779e-14	5.17241e-20	1.50489e-15	2.761e-37	1.07199e-30	6.56707e-44	6.38734e-32	0.0120311	0.00317302	0.0320053	1.6351e-20	6.58849e-20	7.61496e-07	1.10896e-14	1.17857e-13	6.04642e-38	0	8.5717e-07	7.51801e-21	1.095e-32	1.74655e-44	3.21767e-33	2.23908e-10	4.34328e-08	0.00282194
acrolein	0.249446	0.117114	0.735525	0.651227	0.505834	0.284451	0.720754	9.22232e-13	7.60725e-14	0.0382934	4.05644e-21	0.106389	0.000307704	0.292402	0.00138492	3.72703e-05	1.42463e-08	5.45345e-08	4.58883e-07	2.3135e-19	0.0201854	8.5717e-07	0	0.000295973	2.69064e-08	7.39867e-14	1.70705e-08	0.559916	0.0401675	0.782157
dibutyl phthalate	0.00886251	0.371092	0.000656734	0.000667397	0.0273369	0.423392	0.0107536	2.11827e-27	1.76994e-21	0.42519	1.56254e-11	4.42723e-18	7.83783e-08	0.000133376	9.26322e-11	9.3054e-09	7.72246e-06	2.00927e-07	2.42756e-08	2.36678e-12	2.08068e-10	7.51801e-21	0.000295973	0	2.39715e-08	9.15261e-15	4.90493e-09	0.0245528	0.0193715	0.00206747
1H-pyrrole-2,5-dione	2.73445e-25	0.0182279	1.34957e-07	0.000281056	2.4935e-10	1.40622e-08	5.94779e-08	4.7897e-25	1.64498e-55	6.59166e-05	7.72468e-45	2.77707e-07	0.0208188	0.062803	0.828495	0.347748	0.104316	3.14972e-12	0.000204618	6.52304e-15	6.56033e-28	1.095e-32	2.69064e-08	2.39715e-08	0	5.15868e-31	1.95903e-42	0.14196	0.594826	0.00522786
sesquiterpenes	1.92573e-12	0.167839	0.000828816	0.000972336	0.000877798	0.00165233	8.49626e-06	6.05978e-36	1.32269e-66	0.000174629	1.3044e-52	1.26387e-09	8.60318e-05	0.000305215	0.00787326	0.0194981	0.0016639	4.05281e-05	0.000101882	1.11211e-12	8.68433e-21	1.74655e-44	7.39867e-14	9.15261e-15	5.15868e-31	0	1.22593e-79	0.972559	0.846045	0.849822
lindestrene	4.11061e-05	0.26015	0.00743744	0.00224464	4.02118e-06	0.0008266	4.42247e-05	2.39719e-24	4.08158e-77	3.86095e-10	1.25778e-60	1.83616e-08	0.000711079	0.563475	0.782533	0.311912	0.239633	2.04114e-05	0.00109757	2.75529e-05	1.92427e-39	3.21767e-33	1.70705e-08	4.90493e-09	1.95903e-42	1.22593e-79	0	0.09299	0.0089001	0.349894
isoprene	0.0225158	0.000642933	0.578864	0.0164261	0.0462079	0.00896784	0.0433995	1.43333e-12	0.0131792	6.55597e-70	7.89852e-07	0.0253613	1.49716e-05	1.37459e-61	0.000994589	3.44013e-24	6.21417e-13	0.13755	1.85461e-07	0.00897267	0.17889	2.23908e-10	0.559916	0.0245528	0.14196	0.972559	0.09299	0	1.96094e-84	0.083073
MACR/MVK/ISOPOOH	0.622382	0.0834571	0.751786	0.910583	0.574332	0.223544	0.912728	4.44308e-06	0.404418	9.34997e-83	3.30198e-18	0.0208707	0.434975	1.41622e-60	0.00063712	7.00535e-22	7.21563e-15	0.000494708	6.13472e-29	0.21405	0.288767	4.34328e-08	0.0401675	0.0193715	0.594826	0.846045	0.0089001	1.96094e-84	0	0.0522663
monoterpenes	1.83829e-11	7.08746e-13	5.73554e-09	1.19224e-05	1.94374e-05	7.56095e-21	2.47996e-10	0.000951322	0.376436	0.00217954	0.230923	0.161948	3.09781e-05	0.00355476	9.00258e-06	0.865199	0.951622	0.454413	0.00171238	0.27327	0.0107007	0.00282194	0.782157	0.00206747	0.00522786	0.849822	0.349894	0.083073	0.0522663	0
